# Supplementary material for: A Conservative Replacement in the Transmembrane Domain of SARS-CoV-2 ORF7a as a Putative Risk Factor in COVID-19
Source: MDPI journal article supplement (doi:10.3390/biology10121276), 2021-12-05
Supplement: s1 [file s1]

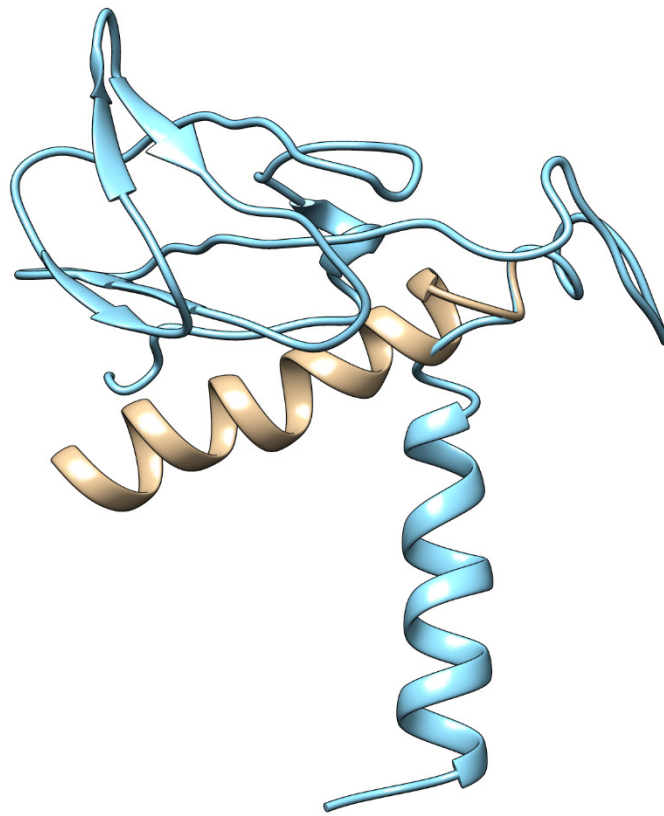

**Figure S1. Chimera-enabled spatial rearrangement of ORF7a transmembrane helix.** The spatial arrangement is shown prior (light brown) and after (light blue) Chimera-enabled transformations.
